# Supplementary material for: Haze evolution in temperate exoplanet atmospheres through surface energy measurements
Source: Springer Nature journal article supplement (doi:10.1038/s41550-021-01375-3), 2021-07-12
Supplement: 41550_2021_1375_MOESM1_ESM.pdf [file 41550_2021_1375_MOESM1_ESM.pdf]

**Supplementary information**

---

**Haze evolution in temperate exoplanet atmospheres through surface energy measurements**

---

In the format provided by the authors and unedited

# Haze Evolution in Temperate Exoplanet Atmospheres Through Surface Energy Measurements

Xinting Yu<sup>\*,1</sup>, Chao He<sup>2</sup>, Xi Zhang<sup>1</sup>, Sarah M. Hörst<sup>2</sup>,  
Austin H. Dymont<sup>3</sup>, Patricia McGuiggan<sup>4</sup>, Julianne I. Moses<sup>5</sup>,  
Nikole K. Lewis<sup>6</sup>, Jonathan J. Fortney<sup>7</sup>, Peter Gao<sup>7</sup>,  
Eliza M.-R. Kempton<sup>8</sup>, Sarah E. Moran<sup>2</sup>, Caroline V. Morley<sup>9</sup>,  
Diana Powell<sup>7</sup>, Jeff A. Valenti<sup>10</sup>, Véronique Vuitton<sup>11</sup>

<sup>1</sup>Department of Earth and Planetary Sciences, University of California Santa Cruz, 1156 High Street, Santa Cruz, California 95064, USA

<sup>2</sup>Department of Earth and Planetary Sciences, Johns Hopkins University, 3400 N. Charles Street, Baltimore, Maryland 21218, USA

<sup>3</sup>Department of Physics, University of California Santa Cruz, 1156 High Street, Santa Cruz, California 95064, USA

<sup>4</sup>Department of Materials Science and Engineering, Johns Hopkins University, 3400 N. Charles Street, Baltimore, Maryland 21218, USA

<sup>5</sup>Space Science Institute, Boulder, CO 80301, USA

<sup>6</sup>Department of Astronomy and Carl Sagan Institute, Cornell University, 122 Sciences Drive, Ithaca, NY 14853, USA

<sup>7</sup>Department of Astronomy and Astrophysics, University of California Santa Cruz, 1156 High Street, Santa Cruz, California 95064, USA

<sup>8</sup>Department of Astronomy, University of Maryland, College Park, MD 20742, USA

<sup>9</sup>Department of Astronomy, The University of Texas at Austin, Austin, TX 78712, USA

<sup>10</sup>Space Telescope Science Institute, Baltimore, MD 21218, USA

<sup>11</sup>University Grenoble Alpes, CNRS, CNES, IPAG, F-38000 Grenoble, France

April 8, 2021

\*Email: xintingyu@ucsc.edu

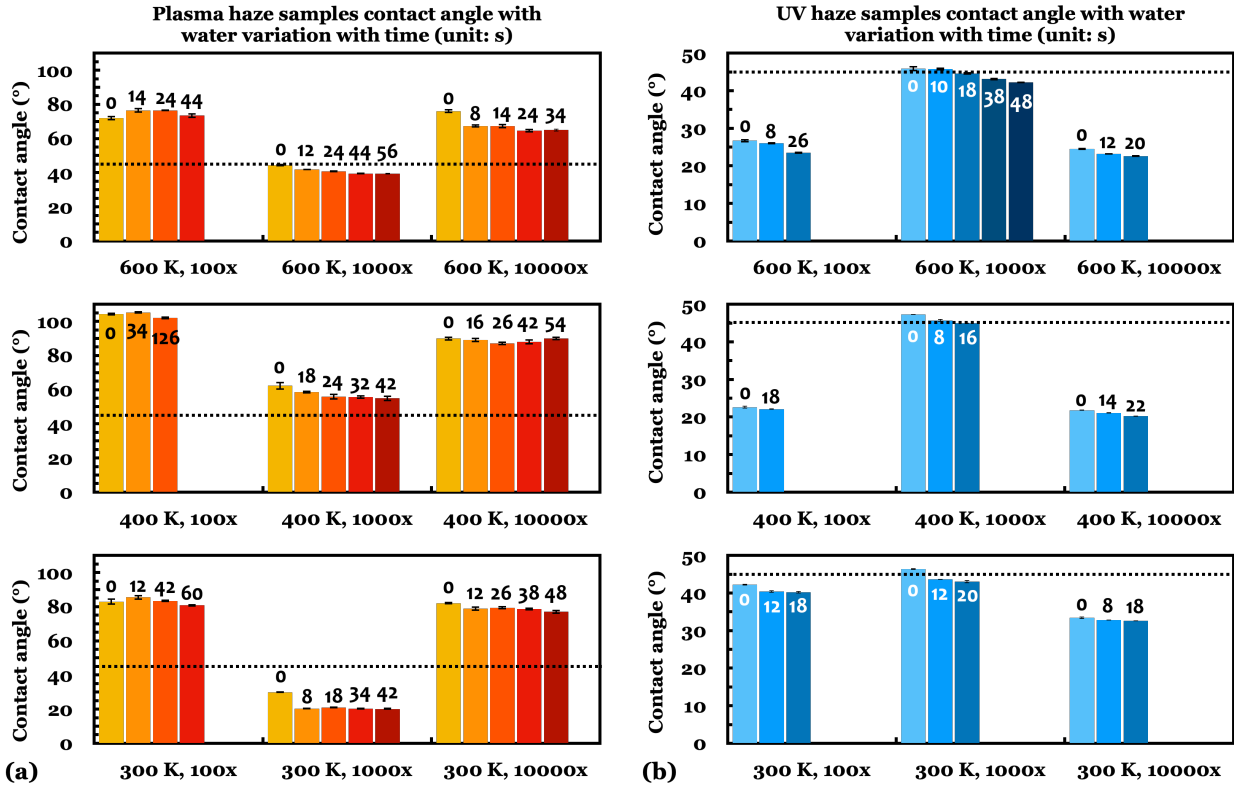

Supplementary Figure 1: **Variation of the measured mean contact angles with time between the haze samples and liquid water.** (a) Contact angle variation for the plasma haze samples. (b) Contact angle variation for the UV haze samples. All marked times are in seconds. All contact angles was measured through circle fitting. The error bars represent  $1\text{-}\sigma$  s.d. measurement uncertainties from the fitting algorithm.

## References

- [1] Lifshitz, E. M. & Hamermesh, M. The theory of molecular attractive forces between solids. In Perspectives in Theoretical Physics (Pergamon, 1992).
- [2] Israelachvili, J. N. Intermolecular and surface forces (Academic Press, 2011).

Supplementary Table 1: **Measured mean contact angle values between the test liquids and the plasma exoplanet tholin samples.** All numbers have units of degrees. The contact angle was measured through both circle fitting and ellipse fitting. The 1- $\sigma$  s.d. measurement uncertainties for each fitting algorithms are also recorded.

| Liquid        | 600 K, 100 $\times$ |     |         |     | 600 K, 1000 $\times$ |     |         |     | 600 K, 10000 $\times$ |     |         |     |
|---------------|---------------------|-----|---------|-----|----------------------|-----|---------|-----|-----------------------|-----|---------|-----|
|               | Circle              | SD  | Ellipse | SD  | Circle               | SD  | Ellipse | SD  | Circle                | SD  | Ellipse | SD  |
| Water         | 78.4                | 1.6 | 74.8    | 3.9 | 45.4                 | 1.1 | 44.8    | 1.8 | 82.4                  | 4.5 | 81.1    | 5.2 |
| Diiodomethane | 44.3                | 2.3 | 41.9    | 2.7 | 48.2                 | 1.4 | 46.9    | 3.2 | 58.7                  | 4.4 | 57.9    | 6.0 |

---

| Liquid        | 400 K, 100 $\times$ |     |         |     | 400 K, 1000 $\times$ |     |         |     | 400 K, 10000 $\times$ |     |         |     |
|---------------|---------------------|-----|---------|-----|----------------------|-----|---------|-----|-----------------------|-----|---------|-----|
|               | Circle              | SD  | Ellipse | SD  | Circle               | SD  | Ellipse | SD  | Circle                | SD  | Ellipse | SD  |
| Water         | 102.7               | 3.7 | 101.9   | 3.1 | 64.7                 | 0.7 | 62.0    | 1.8 | 91.5                  | 1.7 | 91.1    | 2.8 |
| Diiodomethane | 60.5                | 1.7 | 61.0    | 2.0 | 49.6                 | 4.5 | 49.4    | 4.5 | 48.3                  | 2.3 | 50.3    | 2.9 |

---

| Liquid        | 300 K, 100 $\times$ |     |         |     | 300 K, 1000 $\times$ |     |         |     | 300 K, 10000 $\times$ |     |         |     |
|---------------|---------------------|-----|---------|-----|----------------------|-----|---------|-----|-----------------------|-----|---------|-----|
|               | Circle              | SD  | Ellipse | SD  | Circle               | SD  | Ellipse | SD  | Circle                | SD  | Ellipse | SD  |
| Water         | 86.7                | 1.4 | 82.9    | 1.9 | 32.5                 | 2.6 | 33.0    | 3.0 | 85.3                  | 3.3 | 83.1    | 4.3 |
| Diiodomethane | 53.1                | 5.0 | 49.7    | 3.5 | 50.7                 | 0.6 | 51.1    | 2.3 | 56.8                  | 2.0 | 54.1    | 3.6 |

Supplementary Table 2: **Measured mean contact angle values between the test liquids and the UV exoplanet tholin samples.** All numbers have units of degrees. The contact angle was measured through both circle fitting and ellipse fitting. The 1- $\sigma$  s.d. measurement uncertainties for each fitting algorithms are also recorded.

| Liquid        | 600 K, 100 $\times$ |     |         |     | 600 K, 1000 $\times$ |     |         |     | 600 K, 10000 $\times$ |     |         |     |
|---------------|---------------------|-----|---------|-----|----------------------|-----|---------|-----|-----------------------|-----|---------|-----|
|               | Circle              | SD  | Ellipse | SD  | Circle               | SD  | Ellipse | SD  | Circle                | SD  | Ellipse | SD  |
| Water         | 23.6                | 2.5 | 24.6    | 3.4 | 46.8                 | 3.2 | 45.9    | 3.7 | 23.7                  | 1.5 | 25.1    | 2.9 |
| Diiodomethane | 51.2                | 0.8 | 49.9    | 2.8 | 59.4                 | 0.8 | 57.4    | 2.4 | 43.9                  | 1.4 | 42.4    | 1.9 |

---

| Liquid        | 400 K, 100 $\times$ |     |         |     | 400 K, 1000 $\times$ |     |         |     | 400 K, 10000 $\times$ |     |         |     |
|---------------|---------------------|-----|---------|-----|----------------------|-----|---------|-----|-----------------------|-----|---------|-----|
|               | Circle              | SD  | Ellipse | SD  | Circle               | SD  | Ellipse | SD  | Circle                | SD  | Ellipse | SD  |
| Water         | 28.5                | 6.2 | 28.7    | 5.8 | 49.2                 | 2.5 | 48.2    | 2.0 | 20.6                  | 0.7 | 21.4    | 1.5 |
| Diiodomethane | 40.1                | 2.6 | 38.9    | 2.8 | 52.6                 | 3.1 | 52.0    | 3.1 | 44.2                  | 2.1 | 42.6    | 3.3 |

---

| Liquid        | 300 K, 100 $\times$ |     |         |     | 300 K, 1000 $\times$ |     |         |     | 300 K, 10000 $\times$ |     |         |     |
|---------------|---------------------|-----|---------|-----|----------------------|-----|---------|-----|-----------------------|-----|---------|-----|
|               | Circle              | SD  | Ellipse | SD  | Circle               | SD  | Ellipse | SD  | Circle                | SD  | Ellipse | SD  |
| Water         | 40.6                | 1.0 | 38.3    | 1.8 | 40.9                 | 5.6 | 39.6    | 5.3 | 36.1                  | 3.2 | 35.4    | 2.6 |
| Diiodomethane | 47.9                | 1.6 | 47.1    | 2.9 | 60.6                 | 2.3 | 58.0    | 2.5 | 46.3                  | 1.4 | 44.4    | 2.1 |

Supplementary Table 3: **The derived mean surface energy values of the cold plasma exoplanet haze samples.** The surface energy values are derived with the OWRK two-liquid method using the circle fitting contact angles in Supplementary Table 1. The total surface energy,  $\gamma_s^{\text{tot}}$ , can be partitioned into a dispersive component,  $\gamma_s^d$ , and a polar component,  $\gamma_s^p$ . All numbers have units of mJ/m<sup>2</sup>. The error ranges shown are 1- $\sigma$  s.d. uncertainties calculated through propagation of error.

| 600 K, 100 $\times$     |              |                 |                 | 600 K, 1000 $\times$    |              |                 |                 | 600 K, 10000 $\times$   |              |                 |                 |
|-------------------------|--------------|-----------------|-----------------|-------------------------|--------------|-----------------|-----------------|-------------------------|--------------|-----------------|-----------------|
| $\gamma_s^{\text{tot}}$ |              | SD              |                 | $\gamma_s^{\text{tot}}$ |              | SD              |                 | $\gamma_s^{\text{tot}}$ |              | SD              |                 |
| 41.9                    |              | 1.3             |                 | 58.3                    |              | 0.9             |                 | 34.3                    |              | 2.9             |                 |
| $\gamma_s^d$            | $\gamma_s^p$ | SD <sup>d</sup> | SD <sup>p</sup> | $\gamma_s^d$            | $\gamma_s^p$ | SD <sup>d</sup> | SD <sup>p</sup> | $\gamma_s^d$            | $\gamma_s^p$ | SD <sup>d</sup> | SD <sup>p</sup> |
| 37.4                    | 4.5          | 0.9             | 1.0             | 35.3                    | 23.0         | 0.6             | 0.8             | 29.3                    | 5.0          | 1.9             | 2.6             |
| 400 K, 100 $\times$     |              |                 |                 | 400 K, 1000 $\times$    |              |                 |                 | 400 K, 10000 $\times$   |              |                 |                 |
| $\gamma_s^{\text{tot}}$ |              | SD              |                 | $\gamma_s^{\text{tot}}$ |              | SD              |                 | $\gamma_s^{\text{tot}}$ |              | SD              |                 |
| 28.5                    |              | 2.1             |                 | 46.3                    |              | 1.8             |                 | 36.4                    |              | 1.3             |                 |
| $\gamma_s^d$            | $\gamma_s^p$ | SD <sup>d</sup> | SD <sup>p</sup> | $\gamma_s^d$            | $\gamma_s^p$ | SD <sup>d</sup> | SD <sup>p</sup> | $\gamma_s^d$            | $\gamma_s^p$ | SD <sup>d</sup> | SD <sup>p</sup> |
| 28.3                    | 0.2          | 0.7             | 2.1             | 34.5                    | 11.8         | 1.8             | 1.2             | 35.2                    | 1.2          | 0.9             | 1.1             |
| 300 K, 100 $\times$     |              |                 |                 | 300 K, 1000 $\times$    |              |                 |                 | 300 K, 10000 $\times$   |              |                 |                 |
| $\gamma_s^{\text{tot}}$ |              | SD              |                 | $\gamma_s^{\text{tot}}$ |              | SD              |                 | $\gamma_s^{\text{tot}}$ |              | SD              |                 |
| 35.3                    |              | 1.9             |                 | 65.1                    |              | 1.3             |                 | 34.0                    |              | 1.9             |                 |
| $\gamma_s^d$            | $\gamma_s^p$ | SD <sup>d</sup> | SD <sup>p</sup> | $\gamma_s^d$            | $\gamma_s^p$ | SD <sup>d</sup> | SD <sup>p</sup> | $\gamma_s^d$            | $\gamma_s^p$ | SD <sup>d</sup> | SD <sup>p</sup> |
| 32.5                    | 2.8          | 2.1             | 1.3             | 33.9                    | 31.2         | 0.2             | 1.3             | 30.4                    | 3.6          | 0.8             | 1.8             |

Supplementary Table 4: **The derived mean surface energy values of the UV exo-planet haze samples.** The surface energy values are derived with the OWRK two-liquid method using the circle fitting contact angles in Supplementary Table 2. The total surface energy,  $\gamma_s^{\text{tot}}$ , can be partitioned into a dispersive component,  $\gamma_s^d$ , and a polar component,  $\gamma_s^p$ . All numbers have units of mJ/m<sup>2</sup>. The error ranges shown are 1- $\sigma$  s.d. uncertainties calculated through propagation of error.

| 600 K, 100 $\times$     |              |                 |                 | 600 K, 1000 $\times$    |              |                 |                 | 600 K, 10000 $\times$   |              |                 |                 |
|-------------------------|--------------|-----------------|-----------------|-------------------------|--------------|-----------------|-----------------|-------------------------|--------------|-----------------|-----------------|
| $\gamma_s^{\text{tot}}$ |              | SD              |                 | $\gamma_s^{\text{tot}}$ |              | SD              |                 | $\gamma_s^{\text{tot}}$ |              | SD              |                 |
| 69.3                    |              | 1.1             |                 | 54.6                    |              | 1.9             |                 | 70.7                    |              | 0.9             |                 |
| $\gamma_s^d$            | $\gamma_s^p$ | SD <sup>d</sup> | SD <sup>p</sup> | $\gamma_s^d$            | $\gamma_s^p$ | SD <sup>d</sup> | SD <sup>p</sup> | $\gamma_s^d$            | $\gamma_s^p$ | SD <sup>d</sup> | SD <sup>p</sup> |
| 33.6                    | 35.7         | 0.3             | 1.0             | 28.9                    | 25.7         | 0.3             | 1.9             | 37.6                    | 33.1         | 0.5             | 0.8             |
| 400 K, 100 $\times$     |              |                 |                 | 400 K, 1000 $\times$    |              |                 |                 | 400 K, 10000 $\times$   |              |                 |                 |
| $\gamma_s^{\text{tot}}$ |              | SD              |                 | $\gamma_s^{\text{tot}}$ |              | SD              |                 | $\gamma_s^{\text{tot}}$ |              | SD              |                 |
| 69.5                    |              | 3.1             |                 | 54.7                    |              | 2.0             |                 | 71.8                    |              | 1.0             |                 |
| $\gamma_s^d$            | $\gamma_s^p$ | SD <sup>d</sup> | SD <sup>p</sup> | $\gamma_s^d$            | $\gamma_s^p$ | SD <sup>d</sup> | SD <sup>p</sup> | $\gamma_s^d$            | $\gamma_s^p$ | SD <sup>d</sup> | SD <sup>p</sup> |
| 39.6                    | 29.9         | 0.9             | 3.0             | 32.8                    | 21.9         | 1.3             | 1.8             | 37.4                    | 34.4         | 0.8             | 0.7             |
| 300 K, 100 $\times$     |              |                 |                 | 300 K, 1000 $\times$    |              |                 |                 | 300 K, 10000 $\times$   |              |                 |                 |
| $\gamma_s^{\text{tot}}$ |              | SD              |                 | $\gamma_s^{\text{tot}}$ |              | SD              |                 | $\gamma_s^{\text{tot}}$ |              | SD              |                 |
| 61.2                    |              | 0.9             |                 | 58.2                    |              | 3.3             |                 | 64.1                    |              | 1.9             |                 |
| $\gamma_s^d$            | $\gamma_s^p$ | SD <sup>d</sup> | SD <sup>p</sup> | $\gamma_s^d$            | $\gamma_s^p$ | SD <sup>d</sup> | SD <sup>p</sup> | $\gamma_s^d$            | $\gamma_s^p$ | SD <sup>d</sup> | SD <sup>p</sup> |
| 35.4                    | 25.8         | 0.6             | 0.8             | 28.2                    | 30.0         | 1.0             | 3.3             | 36.3                    | 27.8         | 0.5             | 1.8             |

Supplementary Table 5: **Derived mean refractive indices of the haze samples in the visible wavelengths ( $n_{vis}$ ).** The refractive indices are derived using the Lifshitz theory of van der Waals forces [1, 2]. The error ranges shown are 1- $\sigma$  s.d. uncertainties calculated through propagation of error.

| Plasma                        |                      |                       | UV                        |                      |                       |
|-------------------------------|----------------------|-----------------------|---------------------------|----------------------|-----------------------|
| 600 K, 100 $\times$           | 600 K, 1000 $\times$ | 600 K, 10000 $\times$ | 600 K, 100 $\times$       | 600 K, 1000 $\times$ | 600 K, 10000 $\times$ |
| 1.53 $\pm$ 0.04               | 1.64 $\pm$ 0.05      | 1.47 $\pm$ 0.04       | 1.72 $\pm$ 0.05           | 1.62 $\pm$ 0.05      | 1.73 $\pm$ 0.06       |
| 400 K, 100 $\times$           | 400 K, 1000 $\times$ | 400 K, 10000 $\times$ | 400 K, 100 $\times$       | 400 K, 1000 $\times$ | 400 K, 10000 $\times$ |
| 1.42 $\pm$ 0.03               | 1.56 $\pm$ 0.04      | 1.48 $\pm$ 0.04       | 1.72 $\pm$ 0.06           | 1.62 $\pm$ 0.05      | 1.73 $\pm$ 0.06       |
| 300 K, 100 $\times$           | 300 K, 1000 $\times$ | 300 K, 10000 $\times$ | 300 K, 100 $\times$       | 300 K, 1000 $\times$ | 300 K, 10000 $\times$ |
| 1.47 $\pm$ 0.04               | 1.69 $\pm$ 0.05      | 1.47 $\pm$ 0.04       | 1.66 $\pm$ 0.05           | 1.64 $\pm$ 0.05      | 1.68 $\pm$ 0.05       |
| Titan plasma: 1.71 $\pm$ 0.06 |                      |                       | Titan UV: 1.70 $\pm$ 0.06 |                      |                       |

Supplementary Table 6: **Measured mean contact angle values between the test liquids and substrates.** All numbers have units of degrees. The contact angle was measured through both circle fitting and ellipse fitting. The 1- $\sigma$  s.d. measurement uncertainties for each fitting algorithms are also recorded.

| Liquid        | Quartz disc |     |         |     | Cleaved mica |     |         |     |
|---------------|-------------|-----|---------|-----|--------------|-----|---------|-----|
|               | Circle      | SD  | Ellipse | SD  | Circle       | SD  | Ellipse | SD  |
| Water         | 15.2        | 2.0 | 16.6    | 2.6 | spread       | n/a | spread  | n/a |
| Diiodomethane | 36.8        | 1.0 | 39.3    | 1.9 | 38.8         | 1.5 | 39.4    | 1.7 |

Supplementary Table 7: **The derived mean surface energy values of the substrates.** The surface energy values are derived with the OWRK two-liquid method using the circle fitting contact angles in Supplementary Table 6. The total surface energy,  $\gamma_s^{tot}$ , can be partitioned into a dispersive component,  $\gamma_s^d$ , and a polar component,  $\gamma_s^p$ . All numbers have units of mJ/m<sup>2</sup>. The error ranges shown are 1- $\sigma$  s.d. uncertainties through propagation of error.

| Quartz disc      |              |                 |                 | Mica disk        |              |                 |                 |
|------------------|--------------|-----------------|-----------------|------------------|--------------|-----------------|-----------------|
| $\gamma_s^{tot}$ |              | SD              |                 | $\gamma_s^{tot}$ |              | SD              |                 |
| 75.1             |              | 0.9             |                 | 76.8             |              | 0.6             |                 |
| $\gamma_s^d$     | $\gamma_s^p$ | SD <sup>d</sup> | SD <sup>p</sup> | $\gamma_s^d$     | $\gamma_s^p$ | SD <sup>d</sup> | SD <sup>p</sup> |
| 41.2             | 33.9         | 0.3             | 0.6             | 40.2             | 36.6         | 0.5             | 0.5             |
